# Supplementary material
Source: Research Square preprint supplement (doi:10.21203/rs.3.rs-8080114/v1)
Supplement: Supplementary file 1 [file 08cfec3d94ae583bee4922eb.docx]

*Table 2:* Healthcare system and demographic profile of study countries

| Country | Income group | Pop. | 65+ pop. (%) | Region | Life exp. | Dementia prev. (%) | Nat. Dementia Plan | Internet penetration (%) | Health exp. (% GDP) | Physicians/1000 | UHC (Yes/No) |
| --- | --- | --- | --- | --- | --- | --- | --- | --- | --- | --- | --- |
| Australia | HIC | 26.0M | 16.9% | Oceania | 84.1 | 18.1 | Yes | 97.6% | 10,5% | 4.1 | Yes |
| Belgium | HIC | 11.7M | 19.4% | Europe | 82.3 | 18.8 | Yes | 86.3% | 11% | 3.2 | Yes |
| Brazil | UMIC | 215.3M | 10.9% | Latin Am | 76.0 | 15.3 | Yes | 77.1% | 10.7% | 2.4 | Yes |
| Bulgaria | HIC | 6.5M | 23.5% | Europe | 75.8 | 23.6 | Yes | 65.2% | 7.3% | 4.2 | Yes |
| Chile | HIC | 19.6M | 12.5% | Latin Am | 81.3 | 16.6 | Yes | 76.3% | 9% | 2.9 | Yes |
| Cuba | UMIC | 11.2M | 16.1% | Latin Am | 78.2 | NA | Yes | 50.1% | 13.8% | 5.9 | Yes |
| Cyprus | HIC | 1.3M | 14.3% | Europe | 81.7 | NA | Yes | 91.2% | 8.8% | 3.6 | Yes |
| Democratic Republic of Congo (DRC) | LIC | 99.0M | 2.8% | Africa | 62.1 | NA | No | 29.5% | 3.8% | 0.4 | No |
| France | HIC | 67.9M | 21.9% | Europe | 83.4 | 24.0 | Yes | 92.2% | 12.8% | 3.3 | Yes |
| Greece | HIC | 10.4M | 22.8% | Europe | 82.0 | 24.1 | Yes | 75.9% | 8.5% | 6.3 | Yes* |
| India | LMIC | 1.417B | 6.9% | Asia | 72.2 | 4.9 | Yes | 62.6% | 3.8% | 0.7 | No |
| Indonesia | UMIC | 275.5M | 6.8% | Asia | 71.3 | 7.1 | Yes | 78.8% | 3.7% | 0.7 | Yes (near-UHC) |
| Ireland | HIC | 5.1M | 15.1% | Europe | 82.6 | 16.3 | Yes | 80.7% | 6.9% | 4.1 | No (transition) |
| Israel | HIC | 9.6M | 12.5% | Asia | 82.7 | 11.1 | Yes | 76.3% | 8,3% | 3.6 | Yes |
| Kenya | LMIC | 54.0M | 2.9% | Africa | 63.8 | NA | No | 16.7% | 4.5% | 0.2 | No |
| Russia | HIC | 144.2M | 15.6% | Europe | 73.3 | NA | Yes | 89.5% | 4.3% | 4.2 | Yes |
| UK (Scotland) | HIC | 5.5M | 19.4% | Europe | 81.4 | 16.2 (UK data) | Yes | 96.6% (UK data) | 10.9% (UK data) | 3.2 | Yes |

Note: Income group – HIC (high income), UMIC (upper middle income), LMIC (lower middle income), LIC (low income). Pop. - total population. 65+ Pop. (%) - percentage of population aged 65 and over. Region - geographical region. Life Exp. - life expectancy at birth in years. Dementia Prev. (%) – estimated prevalence of dementia as a percentage of population. NA – data not available. Nat. Dementia Plan - existence of a National Dementia Strategy or Plan (Yes/No). Internet Penetration (%) - internet penetration rate as a percentage of population with internet access. Health Exp. (% GDP) - healthcare expenditure as a percentage of Gross Domestic Product. Physicians/1000 - number of physicians per 1,000 people. UHC - Universal Health Care.

* Greece provides formal entitlement to all residents, but effective coverage gaps remain due to access and cost-sharing barriers.
