# Supplementary material
Source: Research Square preprint supplement (doi:10.21203/rs.3.rs-8080114/v1)
Supplement: Supplementary file 2 [file 1b9985795898b8e3c14c530c.docx]

*Table 3:* Online dementia resource availability and provider characteristics

| Country | Number of websites* | Type of providers (*n*) | | | | Geographical spread | | |
| --- | --- | --- | --- | --- | --- | --- | --- | --- |
| NGO (incl. charity | Public/ Government | Private company | Other | National | Regional | Local |
| Australia | 18 | 6 | 7 | 2 | 31 | 12 | 6 | - |
| Belgium | 16 | 15 | - | - | 12 | 8 | 7 | 1 |
| Brazil | 4 | 3 | 1 | - | - | 3 | 13 | - |
| Bulgaria | 4 | 2 | - | - | 24 | 4 | - | - |
| Chile | 3 | 2 | - | 1 | - | 2 | - | 1 |
| Cuba | - | - | - | - | - | - | - | - |
| Cyprus | 3 | 2 | 1 | - | - | 3 | - | - |
| Democratic Republic of Congo | - | - | - | - | - | - | - | - |
| France | 11 | 8 | 1 | 2 | - | 11 | - | - |
| Greece | 5 | 3 | - | 2 | - | 1 | 2 | 3 |
| India | 5 | 4 | - | 1 | - | 4 | 1 | - |
| Indonesia | 2 | 1 | - | 1 | - | 2 | - | - |
| Ireland | 9 | 5 | 2 | 1 | 15 | 8 | 1 | - |
| Israel | 8 | 7 | 1 | - | - | 8 | - | - |
| Kenya | 1 | 1 | - | - | - | 1 | - | - |
| Russia | 20 | 11 | 3 | 4 | 2 | 19 | 1 | - |
| UK(Scotland) | 15 | 14 | 1 | - | - | 8 | 7 |  |

Note: *Identified within first 10 pages of Google search results

1University of Tasmania Online course; Forward with Dementia; Dementia downunder peer-ped community

2Senior Center St. Francis V.o.G.

3Abraz.org.br national reach with regional chapters

4EU-funded educational initiative access-dementia.eu and EU-funded project (INDEED) dementia-bulgaria.com

5National Centre for Excellence in Dementia Care - Academic/Healthcare Partnership (Trinity College Dublin/St. James's Hospital)
