# Supplementary material
Source: Research Square preprint supplement (doi:10.21203/rs.3.rs-8080114/v1)
Supplement: Supplementary file 3 [file 851b1ae0090a5303857879c5.docx]

Instructions for AI analysis:

1. Objective: Analyze the provided dementia-related website using the comprehensive prompt below. Provide accurate, consistent, and detailed evaluations that can be compared across different countries and cultures.

2. Process:

a. Visit the website URL provided.

b. Thoroughly explore the website, including main pages, subpages, and features.

c. Answer each section of the prompt based on your observations.

d. For numerical ratings, use the full scale (1-5) and refer to the criteria provided for each score.

3. Cross-Cultural Consistency Guidelines:

a. Cultural Neutrality: Maintain a culturally neutral perspective. Avoid applying standards specific to any one country or culture.

b. Language Awareness:

- If the website is not in English, clearly state the language and use translation tools if necessary.

- Assess language complexity relative to the country's general literacy levels.

c. Service Relevance: Evaluate services in the context of the country's healthcare system and cultural norms.

d. Design Interpretation: Consider that design preferences may vary across cultures. Focus on functionality and clarity rather than aesthetic preferences.

4. Consistency Measures:

a. Use the provided 1-5 scale consistently across all websites, regardless of country.

b. When assessing comprehensiveness or quality, compare to global best practices rather than country-specific standards.

c. For each criterion, provide a brief justification for the score to ensure transparency in decision-making.

5. Contextual Considerations:

a. Technology Access: Consider the country's general level of internet access and digital literacy when assessing website sophistication.

b. Legal Framework: Be aware that privacy laws and healthcare regulations vary by country. Note any apparent compliance with local regulations without penalizing for differences.

c. Cultural Sensitivity: Note any culturally specific content or approaches, but evaluate based on appropriateness for the target audience rather than personal cultural norms.

6. Limitations and Bias Awareness:

a. Acknowledge any limitations in assessing content in unfamiliar languages or cultural contexts.

b. Be aware of potential biases towards Western web design standards and actively work to evaluate based on functionality and user needs.

7. Ethical and Technical Considerations:

a. Do not access any private or restricted areas of the website.

b. Do not provide personal opinions on medical advice or treatment options.

c. If unable to assess certain technical aspects due to AI limitations, clearly state this in your report.

Analysis Prompt:

1. General Information:

a. Website URL:

b. Country:

c. Brief statement about the country's context:

- Type of healthcare system

- Internet penetration

e. Type of provider:

- NGO/Non-profit

- Government

- Healthcare organization

- Academic institution

- Private company

- Other (specify)

f. Geographical access:

- National

- Regional (specify region)

- Local (specify locality)

- International

2. Types of services offered (list all that apply):

a. Information and education

b. Support groups

c. Helplines

d. Care planning tools

e. Resource directories

f. Online training programs

g. Research updates

h. Legal and financial advice

i. Respite care information

j. Assistive technology resources

k. Other (specify)

3. Unique features or innovative services:

[Describe any standout or novel services or features, particularly those that address country-specific needs]

4. Overall Comprehensiveness Assessment:

Rate each aspect on a scale of 1-5, where 1 is poor and 5 is excellent. Provide a brief justification for each score.

a. Breadth of information:

1 - Covers only basic facts about dementia

3 - Covers multiple aspects (e.g., symptoms, diagnosis, treatment)

5 - Comprehensive coverage of all major aspects of dementia

Score: [1-5] Justification:

b. Depth of content:

1 - Superficial information only

3 - Moderate detail on most topics

5 - In-depth, detailed information on all topics

Score: [1-5] Justification:

c. Range of services:

1 - Offers 1-2 types of services

3 - Offers 3-5 types of services

5 - Offers 6 or more types of services

Score: [1-5] Justification:

d. User support:

1 - No interactive support features

3 - Some support features (e.g., FAQ, contact form)

5 - Multiple support options (e.g., helpline, chat, forums)

Score: [1-5] Justification:

e. Resource quality:

1 - Limited or outdated resources

3 - Mix of current and older resources

5 - Up-to-date, evidence-based resources with regular updates

Score: [1-5] Justification:

f. Accessibility and usability:

1 - Difficult to navigate or access information

3 - Reasonably easy to use with some navigation aids

5 - Highly accessible with clear structure and multiple accessibility features

Score: [1-5] Justification:

g. Content Accuracy and Currency:

1 - Information appears outdated or contains noticeable inaccuracies

3 - Most information seems current and accurate, with some areas for improvement

5 - All information is up-to-date, accurate, and cites reputable sources

Score: [1-5] Justification:

Overall Comprehensiveness Score (average of a-g, rounded to nearest 0.5): [Calculate]

5. Detailed Accessibility and Usability Assessment:

Rate each aspect on a scale of 1-5, where 1 is poor and 5 is excellent. Provide a brief justification for each score.

a. Navigation Structure:

1 - Confusing layout, difficult to find information

3 - Basic menu structure, some information requires multiple clicks

5 - Clear, intuitive navigation with logical information hierarchy

Score: [1-5] Justification:

b. Search Functionality:

1 - No search feature

3 - Basic search available, but results may not be well-organized

5 - Advanced search with filters, well-organized results

Score: [1-5] Justification:

c. Readability:

1 - Dense text, complex language, small font size

3 - Mix of simple and complex language, average font size

5 - Clear, simple language, adjustable font size, good contrast

Score: [1-5] Justification:

d. Mobile Responsiveness:

1 - Not mobile-friendly

3 - Basic mobile version, some features may not work well

5 - Fully responsive design, works well on all devices

Score: [1-5] Justification:

e. Assistive Technology Compatibility:

1 - Not compatible with screen readers or other assistive technologies

3 - Basic compatibility, some features may not work with assistive tech

5 - Fully compatible with various assistive technologies

Score: [1-5] Justification:

f. Alternative Text for Images:

1 - No alt text for images

3 - Some images have alt text, but not all

5 - All images have descriptive alt text

Score: [1-5] Justification:

g. Color Contrast:

1 - Poor contrast, difficult to read

3 - Adequate contrast for most text

5 - High contrast throughout, option to switch to high contrast mode

Score: [1-5] Justification:

h. Keyboard Navigation:

1 - Cannot navigate site using only keyboard

3 - Basic keyboard navigation possible, but some features inaccessible

5 - Full keyboard navigation support, including skip-to-content links

Score: [1-5] Justification:

i. Form Accessibility:

1 - Forms are difficult to use, no labels or error messages

3 - Basic form labels, some error messages

5 - Clear labels, helpful error messages, easy tab navigation

Score: [1-5] Justification:

j. Multimedia Accessibility:

1 - No captions or transcripts for audio/video content

3 - Some multimedia content is accessible, but not all

5 - All multimedia content has captions, transcripts, or audio descriptions

Score: [1-5] Justification:

k. Language Options:

1 - Single language only

3 - Two or three language options

5 - Multiple language options, including minority languages

Score: [1-5] Justification:

l. Cultural Sensitivity:

1 - Content appears culturally biased or inappropriate

3 - Some effort at cultural inclusivity, but room for improvement

5 - High cultural sensitivity, inclusive language and imagery

Score: [1-5] Justification:

Detailed Accessibility and Usability Score (average of a-l, rounded to nearest 0.5): [Calculate]

6. User Engagement and Interactivity:

Rate each aspect on a scale of 1-5, where 1 is poor and 5 is excellent. Provide a brief justification for each score.

a. Interactive Tools:

1 - No interactive tools

3 - Basic interactive elements (e.g., quizzes, calculators)

5 - Advanced interactive tools (e.g., personalized care planners, symptom trackers)

Score: [1-5] Justification:

b. Community Features:

1 - No community features

3 - Basic forum or comment section

5 - Active community with moderated discussions, user-generated content

Score: [1-5] Justification:

c. Personalization:

1 - No personalization options

3 - Basic personalization (e.g., newsletter preferences)

5 - Advanced personalization (e.g., customized content based on user profile)

Score: [1-5] Justification:

7. Technical and Legal Considerations:

Rate each aspect on a scale of 1-5, where 1 is poor and 5 is excellent. Provide a brief justification for each score.

a. Mobile Optimization:

1 - No mobile optimization

3 - Basic mobile responsiveness

5 - Fully optimized for mobile, including mobile-specific features or app

Score: [1-5] Justification:

b. Privacy and Data Protection:

1 - No clear privacy policy or data protection measures

3 - Basic privacy policy, some data protection measures

5 - Comprehensive privacy policy, strong data protection, compliance with regulations (e.g., GDPR)

Score: [1-5] Justification:

c. Integration with Health Services:

1 - No integration with health services

3 - Basic information about accessing health services

5 - Direct links or referrals to health services, telemedicine options

Score: [1-5] Justification:

8. Sustainability and Credibility:

a. Funding Model:

[Describe the funding model if apparent (e.g., government-funded, donations, commercial)]

b. Last Updated:

[Note the date of the last content update, if available]

c. Organizational Credibility:

1 - Unknown or questionable credibility

3 - Moderately credible organization

5 - Highly credible, well-known organization in the field

Score: [1-5] Justification:

9. Summary:

Provide a comprehensive summary (5-6 sentences) of the website's strengths and potential areas for improvement, considering all aspects evaluated above. Include notes on any standout features, cultural considerations, and the overall user experience for people with dementia and their caregivers. Address how the website meets the needs of its target population within its cultural and national context.

10. Best Practices:

Identify any standout features or approaches that could be considered best practices in providing dementia-related information and services, particularly those that effectively address country-specific challenges.

12. Comparative Analysis:

Briefly compare this website to others you've analyzed from different countries, noting major differences or similarities. Identify any unique approaches or services that might be beneficial if implemented in other countries.

Final Overall Score (average of all scored items, rounded to nearest 0.5): [Calculate]

Date of Evaluation: [Insert date]

Evaluator Name/ID: [Insert name or ID]

Cutoff for training data and knowledge base date: [Insert date]

14. Summary Table:

Create a table summarizing key information from the analysis. The table should include the following columns:

| Website URL | Provider Type | Geographical Access | Types of services offered (list all that apply) | Unique features or innovative services | Best Practice | Comprehensiveness Score | Accessibility Score

****

15. Review and identify any mistakes, provide a revised complete analysis incorporating these corrections
