# Supplementary material
Source: Research Square preprint supplement (doi:10.21203/rs.3.rs-8080114/v1)
Supplement: Supplementary file 4 [file 963d9fe31f7ee36eab817415.docx]

*Table 1:* Keywords search by country (in original language)

| Country | Searched keywords (in original language) |
| --- | --- |
| Australia | Dementia caregiver support, Alzheimer's support groups, respite care for dementia caregivers, dementia education for caregivers |
| Belgium | Mantelzorg, dementie, démence, aidants, patients, [Pflege- und Patenfamilien](https://ostbelgienfamilie.be/desktopdefault.aspx/tabid-5919/) familiäre Pflege, ostbelgien, vlaanderen wallonia |
| Brazil | Demência, Cuidadores, Alzheimer, Associações |
| Bulgaria | Деменция, деменция България, гледачи деменция, организации за болни от деменция, помощ за роднини на болни от деменция |
| Chile | Demencia, cuidadores, demencia cuidadores, demencia chile, cuidadores demencia chile |
| Cuba | ‘Demencia’, ‘Alzheimer’, ‘cuidadores’, ‘recursos’, ‘apoyo’ combined with country/provenance modifiers ‘Cuba’, ‘MINSAP/Ministerio de Salud Pública’, ‘policlínico’, ‘Infomed’ and site-targeted queries site:salud.gob.cu, site:infomed.cu supplemented by English variants ‘Cuba dementia caregiver resources’ |
| Cyprus | Άνοια φροντιστές Κύπρος, άνοια συγγενείς Κύπρος, άνοια Κύπρος |
| Democratic Republic of Congo (DRC) | Demence, aidants, troubles cognitifs |
| France | Troubles cognitifs, démence, aidants, patients, support |
| Greece | άνοια φροντιστές, άνοια, άνοια συγγενείς, άνοια φροντιστές Ελλάδα |
| India | Dementia association, Alzheimer Association, Dementia Care, Alzheimer care, Dementia caregiving |
| Indonesia | Demensia, dukungan, Indonesia, layanan, perawatan, pasien |
| Ireland | Dementia caregiver support Ireland, Alzheimer's support groups Ireland, respite care for dementia caregivers Ireland, dementia education for caregivers Ireland, HSE dementia services Ireland |
| Israel | מטפל עיקרי דמנציה, תמיכה במטפל דמנציה, עזרה למטפל בבן משפחה חולה |
| Kenya | Dementia Kenya, Alzheimer’s Kenya |
| Russia | Поддержка для ухаживающих за людьми с деменцией, pесурсы для опекунов людей с болезнью Альцгеймера, помощь семьям пациентов с деменцией, информация для ухаживающих за пожилыми с когнитивными нарушениями, поддержка родственников людей с деменцией, онлайн ресурсы по уходу за больными деменцией, организации помощи при деменции в России, обучение для ухаживающих за людьми с болезнью Альцгеймера, группы поддержки для семей с деменцией, советы по уходу за людьми с деменцией |
| Turkey (Türkiye) | Demans destek hizmetleri, Bakıcı destek  programları Türkiye, Demans hasta bakımı,  Bakıcı Türkiye demans, bakıcı desteği  türkiye, demans, bakıcı yardımı Türkiye  demans, |
| UK (Scotland) | Caregiver Scotland dementia, carer Scotland dementia, caregiver support Scotland dementia, carer help Scotland dementia |
