# Supplementary material
Source: Research Square preprint supplement (doi:10.21203/rs.3.rs-8080114/v1)
Supplement: Supplementary file 5 [file ab29815c73678389c29c4621.docx]

*Table 5:* Country-specific innovations

| Country | Best practices and innovative approaches |
| --- | --- |
| Australia | Male carer workshops, 24/7 helplines, cultural inclusivity, Staying at Home program, live chat, centralized service finder, eligibility checkers, multilingual resources, symptom checker, Cognitive Dementia and Memory service, Carer-Inclusive Workplace, Young Carers Network, forums, payment info, free modular online courses, tailored programs for younger onset dementia, Circle of Care model, caregiver peer support, ISO 9001 certification, Memory Cafés, Facebook group support |
| Belgium | "Forget-me-not" week annual awareness campaign, training for professionals and caregivers across various care situations, network-based approach to supporting caregivers in bilingual, urban Brussels context, "Semaine des Aidants Proches" initiative, interactive map of local services, resources for young caregivers; "La Compagnie des Aidants" network concept, Job board for caregivers, "Aidant & Emploi" program, Digital platform for peer support, Focus on active aging and social participation for seniors, "Parcours Aidants" program, Digital platform for caregiver connection, "Ville Amie Démence" initiative, Alzheimer Café concept, "Proxidem" project; "Alzheimer Café" adapted for German-speaking community, "Demenzfreundliche Gemeinde" initiative, continuum of care from assisted living to nursing home |
| Brazil | WhatsApp-integrated support groups, 14-episode specialized dementia podcast series, interactive care pathways platform linking primary-specialized care (IATS partnership), regional chapter network with virtual support groups, celebrity ambassador program (Zico) |
| Bulgaria | Family-founded organization with radio podcast program for awareness, sports therapy including international tennis championships participation, three-module professional platform combining education, networking and business development (INDEED project), integrated local-international support network, multi-channel communication combining traditional radio and digital consultations |
| Chile | International partnerships for specialized training, digital education platform (Demencia conCIENCIA), professional development scholarships, recognition awards program, and integrated healthcare-provider networks with progressive learning systems |
| Cyprus | Peer-reviewed content processes, academic and quality control oversight, regional volunteer support structures, integration with official health services, monthly content updates, research-practice integration, local context adaptation, community-based support model, district-level service coordination |
| France | Café-style support meetings, online training platforms, burnout assessment tools, interactive calculators, 3D animations, brain donation program, price comparison tools, email support programs, expert panels, moderated forums, celebrity ambassadors, therapeutic education, animal therapy |
| Greece | Early-onset dementia specialization, psychiatric clinic for caregivers, video consultation platform, 24/7 care availability, international scientific partnerships, dementia-friendly communities program, integrated day-care and home services, specialized caregiver training, electronic scientific library, intergenerational programs |
| India | Specialized dementia villages with make-believe systems, real-time family video updates, multi-purpose sensory environments, free medicine support initiative, international research integration, celebrity advocacy program, bilingual digital resources, unrecognized care models, integrated online-offline support platform |
| Indonesia | Integrated senior living concept pioneering in Indonesia, Continuing Care Retirement Community (CCRC) model adapting international standards, hotel-style quality service standards integrated with healthcare, dosomo specialized caregiver program, flexible stay options (short to long-term), multi-tier accommodation system (from independent to full care), resort-lifestyle integration with medical care, bilingual service delivery system |
| Ireland | Rights-based dementia care approach, Virtual Dementia Hub (Fujitsu partnership), service finder with county mapping, live chat support (scheduled hours), multi-stakeholder engagement through Irish Dementia Working Group and Dementia Carers Campaign Network, evidence-based advocacy with research panels and policy papers, Sonas Programme (communication-focused intervention developed 1990), professional development frameworks, digital inclusion initiatives, Carer Diaries Podcast, funding guidance (HSE, self-funding, tax relief), elder abuse prevention measures, community-focused programs including Memory Cafés, research excellence through Caring Researchers Podcast and Discussion Paper Series, quality assurance systems with professional standards monitoring |
| Israel | Activity kits designed for different stages of dementia, digital courses for both family caregivers and foreign workers, a dedicated phone and Zoom support service, information available in Hebrew, English, Arabic, and Russian, addressing the country’s linguistic diversity |
| Kenya | Religious institution partnerships, multilingual approach, cultural adaptation of services |
| Russia | Children’s stories about dementia “My Grandmother-Yaga”, video lessons for cognitive stimulation, including language exercises, city-specific doctor search, emotional health resources, for example, articles and advice for caregiver wellbeing, Alzheimer-café "Nezabudka" with regular, safe, and supportive in-person and online meetings, "School of Care": free, in-person and online training for caregivers, with downloadable materials and live broadcasts for remote regions, involvement of professionals (doctors, lawyers, designers) and volunteers in service delivery |
| UK(Scotland) | Online community with moderated forums, “find support near you” tool and tailored email support, annual campaign to raise awareness and promote early diagnosis, direct links for users to join dementia research studies, Memory Cafés as community-based support, sometimes in partnership with major organizations (e.g., The Football Association) |
