# Supplementary material
Source: Research Square preprint supplement (doi:10.21203/rs.3.rs-8080114/v1)
Supplement: Supplementary file 6 [file e57ee2cdb8e7a397782e24b4.docx]

*Table 4:* Provider with highest score in addressing carer information needs, by country

| Country | Provider | Type | Information need type | | | | | | Comprehensiveness score (1-5) | Accessibility score (1-5) |
| --- | --- | --- | --- | --- | --- | --- | --- | --- | --- | --- |
| Disease spec. | Healthcare | Info source | Fin. & legal | Self-care info | Average |
| Australia | Dementia Australia | NGO/Non-profit | 100% | 100% | 67% | 90% | 100% | 91% | 5.0 | 4.5 |
| Belgium | Alzheimer Liga Vlaanderen | NGO/Non-profit | 100% | 70% | 100% | 60% | 100% | 86% | 4.5 | 3.5 |
| Brazil | Associação Brasileira de Alzheimer | NGO/Non-profit | 80% | 100% | 100% | 70% | 100% | 90% | 4.0 | 2.5 |
| Bulgaria | Българско Дружество по Деменции | EU-funded Project (INDEED) | 90% | 100% | 83% | 60% | 100% | 87% | 3.5 | 2.5 |
| Chile | Cuidando al cuidador del paciente con la enfermedad de Alzheimer u otras demencias | Private (GalenicumVitae Initiative) | 50% | 80% | 67% | 50% | 100% | 69% | 4.0 | 3.2 |
| Cyprus | Dementia Support | Academic institution (Cyprus University of Technology) | 50% | 80% | 50% | 10% | 100% | 58% | 3.0 | 2.5 |
| France | Aidons les notres | Hybrid (primarily private sector–driven with strong non-profit/NGO partnerships) | 80% | 90% | 83% | 100% | 100% | 91% | 4.5 | 2.5 |
| Greece | Alzheimer Athens Society | NGO/Non-profit | 60% | 80% | 50% | 10% | 100% | 60% | 4.0 | 2.5 |
| India | Dementia India Alliance | NGO/Non-profit | 50% | 80% | 100% | 20% | 50% | 60% | 4.0 | 2.5 |
| Indonesia | Yayasan Alzheimer Indonesia | NGO/Non-profit | 40% | 60% | 67% | 20% | 100% | 57% | 3.5 | 2.5 |
| Ireland | The Alzheimer Society of Ireland | NGO/Non-profit | 70% | 80% | 83% | 30% | 100% | 73% | 4.5 | 3.0 |
| Israel | The Alzheimer's Association of Israel | NGO/Non-profit | 80% | 100% | 100% | 100% | 100% | 96% | 4.5 | 4.0 |
| Kenya | Alzheimer’s Dementia Organisation Kenya | NGO/Non-profit | 40% | 30% | 67% | 0% | 100% | 47% | 3.5 | 2.8 |
| Russia | Проект Memini — информационный ресурс-форум для тех, кто столкнулся с деменцией | NGO/Non-profit (social project supported by doctors, social workers, volunteers, and caregivers) | 60% | 80% | 83% | 70% | 100% | 79% | 4.5 | 3.5 |
| UK(Scotland) | Alzheimer Society UK | NGO/Non-profit | 90% | 90% | 67% | 50% | 100% | 79% | 5.0 | 4.5 |
| Average across countries | - | - | 69% | 81% | 78% | 49% | 97% | 75% | - | - |

*Note:* Disease Spec. - Disease specific information. Healthcare - Healthcare related information. Info Source - Information source. Fin. & Legal - Financial and legal needs. CG Self-Care Info - Caregiver self-care information. Physical - Physical support needs. Social - Social support needs. Emotional - Emotional support needs. Own Needs - Caregiver's own self-care needs. Collab. w/ HC Team - Collaboration with the professional healthcare team. Safety - Safety needs for care recipient. CG - Caregiver. HC - Healthcare. Table does not include countries without online resources (Democratic Republic of Congo, Cuba).
